# Supplementary material for: Evolution of Antibiotic Resistance and the Relationship between the Antibiotic Resistance Genes and Microbial Compositions under Long-Term Exposure to Tetracycline and Sulfamethoxazole
Source: PubMed Central journal article supplement (PMC6926690; doi:10.3390/ijerph16234681), 2019-11-25
Supplement: ijerph-16-04681-s001.pdf [file ijerph-16-04681-s001.pdf]

## Supplementary

**Table S1** Conditions of antibiotics analysis by high performance liquid chromatography

| Analyte                         | Tetracycline                                                                                                | Sulfanilamide                                                                                               |
|---------------------------------|-------------------------------------------------------------------------------------------------------------|-------------------------------------------------------------------------------------------------------------|
|                                 | A: 0.1% formic acid; B:<br>Acetonitrile.                                                                    | A: 0.1% formic acid; B:<br>Acetonitrile.                                                                    |
|                                 | The gradient solvent was                                                                                    | The gradient solvent was                                                                                    |
| Mobile phase                    | as follows: B = 5% (0 min), 5%<br>(0.5 min), 20% (3 min), 70%<br>(3.5 min),<br>95% (8 min) and 5% (12 min). | as follows: B = 10% (0 min), 10%<br>(1 min), 30% (3 min), 65% (5<br>min),<br>70% (10 min) and 10% (12 min). |
| sample injection<br>volume (μL) | 10                                                                                                          | 10                                                                                                          |
| flow rate<br>(ml/min)           | 0.35                                                                                                        | 0.80                                                                                                        |
| Column<br>temperature (°C)      | 35                                                                                                          | 35                                                                                                          |
| standard curve                  | $y = 229.86x - 2.22$                                                                                        | $y = 649.82x - 56.81$                                                                                       |
| r <sup>2</sup>                  | 0.9992                                                                                                      | 0.9943                                                                                                      |

**Table S2.** The relative abundances (gene copies of ARGs normalized to the gene copies of 16S rRNA) of six tetracycline (TC) resistance genes (*tetA*, *tetC*, *tetL*, *tetO*, *tetW* and *tetX*) and three sulfonamide resistance genes (*sul1*, *sul2* and *sul3*) as well as the integrase gene of class 1 integrons (*intI1*) in different phases in system A (control system) and system B (system exposed to antibiotics).

| Operational phases | Tetracycline resistance genes |          |             |          |             |          |             |          |             |          |             |          |
|--------------------|-------------------------------|----------|-------------|----------|-------------|----------|-------------|----------|-------------|----------|-------------|----------|
|                    | <i>tetA</i>                   |          | <i>tetC</i> |          | <i>tetL</i> |          | <i>tetO</i> |          | <i>tetW</i> |          | <i>tetX</i> |          |
|                    | A                             | B        | A           | B        | A           | B        | A           | B        | A           | B        | A           | B        |
| P1                 | 1.41E-04                      | 5.53E-04 | 2.69E-03    | 5.01E-03 | 8.14E-06    | 8.01E-04 | 3.26E-06    | 6.23E-06 | 1.56E-04    | 2.46E-04 | 4.82E-04    | 7.22E-04 |
| P2-1               | 1.14E-03                      | 6.15E-03 | 3.35E-03    | 2.12E-02 | 6.00E-04    | 4.57E-04 | 5.17E-06    | 2.22E-05 | 1.01E-04    | 2.16E-04 | 7.72E-04    | 1.51E-03 |
| P2-2               | 2.41E-03                      | 9.23E-03 | 1.12E-02    | 3.17E-02 | 1.22E-04    | 3.34E-05 | 2.38E-06    | 2.92E-05 | 1.53E-04    | 8.63E-05 | 2.34E-03    | 6.62E-04 |
| P2-3               | 4.67E-03                      | 2.63E-02 | 8.74E-03    | 1.69E-02 | 8.34E-05    | 2.63E-05 | 1.95E-05    | 1.17E-05 | 7.72E-05    | 1.73E-04 | 1.70E-03    | 7.67E-04 |
| P3                 | 4.64E-03                      | 1.29E-02 | 3.39E-04    | 2.40E-02 | 1.91E-04    | 7.70E-05 | 1.16E-05    | 1.27E-04 | 2.09E-04    | 4.80E-04 | 3.20E-04    | 1.16E-03 |
| P4-1               | 9.59E-03                      | 5.28E-03 | 2.73E-03    | 7.74E-02 | 2.14E-04    | 1.96E-03 | 2.53E-05    | 2.87E-05 | 2.53E-04    | 4.64E-04 | 1.84E-03    | 3.44E-03 |
| P4-2               | 9.05E-03                      | 6.02E-03 | 3.46E-03    | 6.17E-02 | 9.88E-05    | 1.63E-03 | 1.51E-05    | 9.45E-06 | 1.42E-04    | 7.08E-04 | 3.56E-03    | 9.32E-03 |
| P4-3               | 3.50E-03                      | 2.68E-03 | 1.73E-03    | 5.77E-02 | 6.78E-05    | 7.30E-03 | 1.05E-05    | 7.59E-06 | 4.18E-05    | 1.83E-04 | 4.51E-03    | 5.85E-03 |
| Max                | 9.59E-03                      | 2.63E-02 | 1.12E-02    | 7.74E-02 | 6.00E-04    | 7.30E-03 | 2.53E-05    | 1.27E-04 | 2.53E-04    | 7.08E-04 | 4.51E-03    | 9.32E-03 |
| Mean               | 4.39E-03                      | 8.64E-03 | 4.28E-03    | 3.69E-02 | 1.73E-04    | 1.54E-03 | 1.16E-05    | 3.03E-05 | 1.42E-04    | 3.20E-04 | 1.94E-03    | 2.93E-03 |
| Min                | 1.41E-04                      | 5.53E-04 | 3.39E-04    | 5.01E-03 | 8.14E-06    | 2.63E-05 | 2.38E-06    | 6.23E-06 | 4.18E-05    | 8.63E-05 | 3.20E-04    | 6.62E-04 |
| SD                 | 3.43E-03                      | 8.06E-03 | 3.71E-03    | 2.55E-02 | 1.85E-04    | 2.44E-03 | 8.11E-06    | 4.03E-05 | 6.86E-05    | 2.10E-04 | 1.49E-03    | 3.15E-03 |
| p                  | .195                          |          | .010*       |          | .166        |          | .237        |          | .030*       |          | .250        |          |

| Operational phases | Sulfonamide resistance genes and the integrase gene of class 1 integron |          |             |          |             |          |              |          |
|--------------------|-------------------------------------------------------------------------|----------|-------------|----------|-------------|----------|--------------|----------|
|                    | <i>sul1</i>                                                             |          | <i>sul2</i> |          | <i>sul3</i> |          | <i>intI1</i> |          |
|                    | A                                                                       | B        | A           | B        | A           | B        | A            | B        |
| P1                 | 1.42E-02                                                                | 1.92E-02 | 1.08E-02    | 1.03E-02 | 3.49E-06    | 5.90E-06 | 7.82E-03     | 7.91E-03 |
| P2-1               | 1.80E-02                                                                | 5.54E-02 | 1.69E-02    | 2.01E-02 | 1.03E-05    | 7.72E-05 | 7.12E-04     | 6.21E-04 |
| P2-2               | 5.66E-02                                                                | 7.14E-02 | 1.35E-02    | 1.50E-02 | 2.59E-05    | 2.74E-05 | 1.92E-03     | 1.14E-03 |
| P2-3               | 2.59E-02                                                                | 6.57E-02 | 1.51E-03    | 8.04E-03 | 3.20E-06    | 4.78E-06 | 3.07E-03     | 1.47E-03 |
| P3                 | 9.63E-03                                                                | 4.87E-02 | 6.34E-03    | 2.47E-02 | 1.89E-06    | 1.23E-05 | 1.94E-04     | 2.35E-03 |
| P4-1               | 3.50E-02                                                                | 8.59E-02 | 1.62E-02    | 2.71E-02 | 7.33E-06    | 2.23E-05 | 7.07E-04     | 1.29E-03 |
| P4-2               | 7.00E-02                                                                | 2.23E-01 | 1.37E-02    | 5.80E-02 | 1.34E-05    | 6.71E-05 | 6.09E-04     | 3.20E-03 |
| P4-3               | 8.11E-02                                                                | 1.88E-01 | 1.58E-02    | 5.17E-02 | 8.47E-06    | 6.82E-05 | 7.33E-04     | 6.32E-04 |
| Max                | 8.11E-02                                                                | 2.23E-01 | 1.69E-02    | 5.80E-02 | 2.59E-05    | 7.72E-05 | 7.82E-03     | 7.91E-03 |
| Mean               | 3.88E-02                                                                | 9.46E-02 | 1.18E-02    | 2.69E-02 | 9.25E-06    | 3.57E-05 | 1.97E-03     | 2.33E-03 |
| Min                | 9.63E-03                                                                | 1.92E-02 | 1.51E-03    | 8.04E-03 | 1.89E-06    | 4.78E-06 | 1.94E-04     | 6.21E-04 |
| SD                 | 2.71E-02                                                                | 7.16E-02 | 5.41E-03    | 1.85E-02 | 7.79E-06    | 3.02E-05 | 2.54E-03     | 2.42E-03 |
| p                  | .015*                                                                   |          | .039*       |          | .035*       |          | .498         |          |

Unit, gene copies /16S Rrna; A = control system; B = system exposed to antibiotics; Max, maximum; Min, minimum; SD, standard deviation; Asterisks (\*) represent significant differences ( $p < 0.05$ ); P1 = operational phase 1 (no antibiotic addition, days 0–40); P2 = operational phase 2 (addition of  $5 \text{ mg} \cdot \text{L}^{-1}$  TC in system B, days 41–200); P3 = operational phase 3 (recovery phase, no antibiotic addition, days 201–240); P4 =

operational phase 4 (addition of  $5\text{mg}\cdot\text{L}^{-1}$  TC and  $1\text{mg}\cdot\text{L}^{-1}$  sulfamethoxazole in system B, days 241–420).

**Table S3.** The abundance of dominant bacterial community at the genus level in the anoxic-aerobic systems (A = control system; B = system exposed to antibiotics) based on the high-throughput genetic sequencing.

|                        | A1   | B1   | A100  | B100  | A200  | B200  | A240 | B240 | A330 | B330  | A420 | B420  |
|------------------------|------|------|-------|-------|-------|-------|------|------|------|-------|------|-------|
| <i>Sphaerotilus</i>    | 0.03 | 0.14 | 0.25  | 1.71  | 34.33 | 31.13 | 0.59 | 0.56 | 5.70 | 1.81  | 1.64 | 0.42  |
| <i>Dechloromonas</i>   | 9.54 | 6.91 | 26.90 | 21.82 | 0.29  | 0.83  | 1.15 | 1.36 | 0.67 | 8.14  | 5.05 | 25.24 |
| <i>Rheinheimera</i>    | 0.10 | 0.43 | 2.34  | 9.38  | 34.72 | 16.09 | 0.91 | 1.13 | 0.25 | 0.09  | 0.03 | 0.01  |
| <i>Aeromonas</i>       | 4.74 | 7.83 | 1.25  | 2.13  | 0.16  | 7.29  | 0.38 | 6.34 | 1.22 | 0.65  | 0.25 | 0.24  |
| <i>Flavobacterium</i>  | 0.00 | 0.25 | 5.22  | 6.37  | 7.51  | 2.45  | 1.36 | 1.03 | 0.75 | 4.31  | 0.91 | 1.40  |
| <i>Hydrogenophaga</i>  | 3.66 | 1.77 | 1.46  | 5.22  | 2.86  | 6.16  | 0.01 | 0.04 | 0.37 | 0.75  | 0.93 | 1.07  |
| <i>Thiothrix</i>       | 0.01 | 0.00 | 12.78 | 2.48  | 0.23  | 0.17  | 0.11 | 0.12 | 3.46 | 24.09 | 1.40 | 5.50  |
| <i>Thauera</i>         | 6.59 | 7.38 | 0.00  | 0.00  | 0.00  | 0.00  | 2.07 | 1.33 | 0.04 | 0.01  | 0.66 | 0.84  |
| <i>Azospira</i>        | 0.10 | 0.23 | 6.67  | 5.89  | 0.06  | 0.11  | 0.01 | 0.01 | 3.07 | 0.26  | 0.75 | 0.34  |
| <i>Undibacterium</i>   | 0.00 | 0.04 | 0.95  | 1.70  | 0.06  | 7.49  | 1.34 | 0.95 | 0.04 | 0.47  | 0.00 | 0.00  |
| <i>Tabrizicola</i>     | 1.62 | 2.13 | 1.33  | 3.73  | 0.11  | 0.15  | 0.00 | 0.00 | 0.00 | 0.00  | 0.00 | 0.00  |
| <i>Zoogloea</i>        | 3.18 | 4.30 | 0.04  | 0.27  | 0.05  | 0.12  | 1.63 | 1.64 | 1.81 | 0.06  | 0.00 | 0.00  |
| <i>Cloacibacterium</i> | 0.49 | 1.11 | 0.55  | 3.81  | 0.15  | 0.91  | 0.06 | 0.30 | 0.02 | 0.21  | 0.00 | 0.00  |
| <i>Rhodobacter</i>     | 1.42 | 2.90 | 0.37  | 0.46  | 0.96  | 0.78  | 0.11 | 0.08 | 2.60 | 0.35  | 3.11 | 0.65  |
| <i>Nitrospira</i>      | 3.01 | 3.40 | 0.07  | 0.04  | 0.01  | 0.01  | 1.83 | 1.09 | 0.14 | 0.05  | 0.27 | 0.13  |
| <i>Ferruginibacter</i> | 2.66 | 2.56 | 0.00  | 0.00  | 0.00  | 0.00  | 8.17 | 7.14 | 0.19 | 0.02  | 0.00 | 0.00  |
| <i>Brevundimonas</i>   | 0.21 | 0.21 | 4.25  | 0.58  | 0.02  | 0.02  | 0.00 | 0.03 | 0.02 | 0.17  | 0.03 | 0.03  |

|                           |       |       |       |       |       |       |       |       |       |       |       |       |
|---------------------------|-------|-------|-------|-------|-------|-------|-------|-------|-------|-------|-------|-------|
| <i>Crocinitomix</i>       | 0.22  | 0.30  | 0.30  | 0.10  | 0.29  | 5.31  | 0.27  | 0.39  | 0.00  | 0.01  | 0.06  | 0.04  |
| <i>Sediminibacterium</i>  | 0.00  | 0.00  | 0.06  | 0.38  | 0.27  | 3.88  | 0.10  | 0.67  | 5.32  | 1.52  | 2.98  | 0.82  |
| <i>Chitinophaga</i>       | 0.00  | 0.00  | 4.50  | 0.35  | 0.02  | 0.05  | 0.02  | 0.03  | 0.29  | 0.22  | 0.23  | 0.15  |
| <i>Pseudomonas</i>        | 0.00  | 0.00  | 0.00  | 0.39  | 0.02  | 0.04  | 1.57  | 5.76  | 0.11  | 0.37  | 0.61  | 0.95  |
| <i>Accumulibacter</i>     | 0.01  | 0.00  | 0.22  | 0.13  | 0.01  | 0.10  | 0.02  | 0.01  | 2.96  | 5.39  | 5.25  | 9.57  |
| <i>Phaeodactylibacter</i> | 0.08  | 0.14  | 3.82  | 1.57  | 0.02  | 0.05  | 0.36  | 0.25  | 0.73  | 3.81  | 2.43  | 1.29  |
| <i>Thermomonas</i>        | 0.92  | 0.59  | 0.00  | 0.00  | 0.00  | 0.00  | 0.55  | 0.40  | 2.64  | 3.60  | 0.88  | 1.79  |
| <i>Bdellovibrio</i>       | 0.43  | 0.21  | 1.05  | 0.13  | 0.01  | 0.34  | 0.50  | 0.38  | 0.51  | 3.17  | 0.12  | 1.34  |
| <i>Runella</i>            | 0.00  | 0.02  | 1.06  | 1.93  | 0.33  | 1.21  | 0.01  | 0.01  | 2.08  | 3.16  | 2.60  | 2.64  |
| <i>Haliscomenobacter</i>  | 1.57  | 1.59  | 0.13  | 0.05  | 0.01  | 0.02  | 0.52  | 0.31  | 3.11  | 1.11  | 4.40  | 1.55  |
| <i>Emticicia</i>          | 0.00  | 0.00  | 0.82  | 0.29  | 0.68  | 1.56  | 0.02  | 0.01  | 0.01  | 0.20  | 0.14  | 0.07  |
| <i>Terrimonas</i>         | 1.27  | 1.45  | 0.00  | 0.00  | 0.00  | 0.00  | 2.03  | 1.69  | 0.22  | 0.32  | 0.09  | 0.13  |
| <i>Arcobacter</i>         | 0.67  | 0.00  | 0.01  | 0.09  | 0.02  | 0.00  | 1.03  | 2.03  | 0.13  | 0.04  | 0.01  | 0.01  |
| others                    | 57.46 | 54.07 | 23.57 | 29.00 | 16.82 | 13.73 | 73.25 | 64.91 | 61.56 | 35.65 | 65.19 | 43.80 |

A1, B1, A100, B100, A200, B200, A240, B240, A330, B330, A420, B420, is corresponding to the operational day of control system A and antibiotics exposure system B on day 1, 100, 200, 240, 330 and 420, respectively.

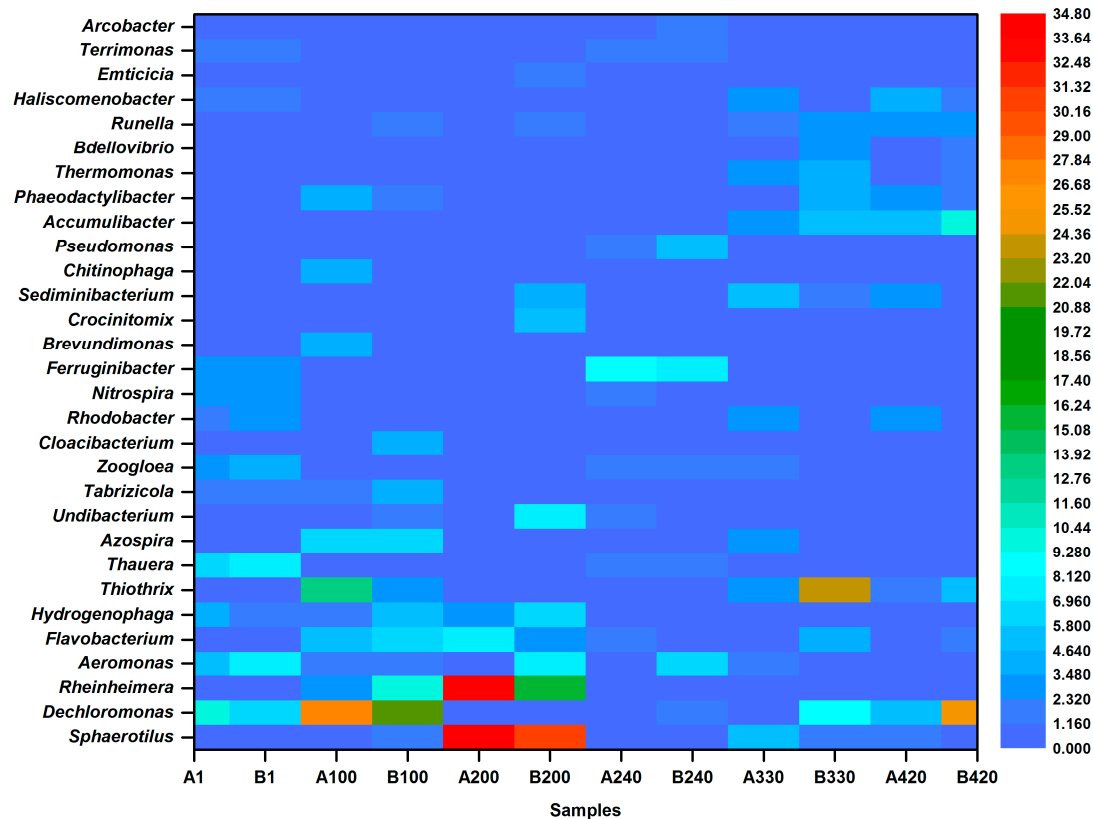

**Fig. S1** The compositions of dominant bacterial community at the genus level in the anoxic-aerobic systems (A = control system; B = system exposed to antibiotics) based on the high-throughput genetic sequencing. The color intensity shows the relative abundance of each genus as the

color key indicates at the right of the figure. (A1, B1, A100, B100, A200, B200, A240, B240, A330, B330, A420, B420, is corresponding to the operational day of control system A and antibiotics exposure system B on day 1, 100, 200, 240, 330 and 420, respectively).
